# Supplementary material
Source: PubMed Central journal article supplement (PMC2277323)
Supplement: NIHMS42957-supplement-01.pdf [file NIHMS42957-supplement-01.pdf]

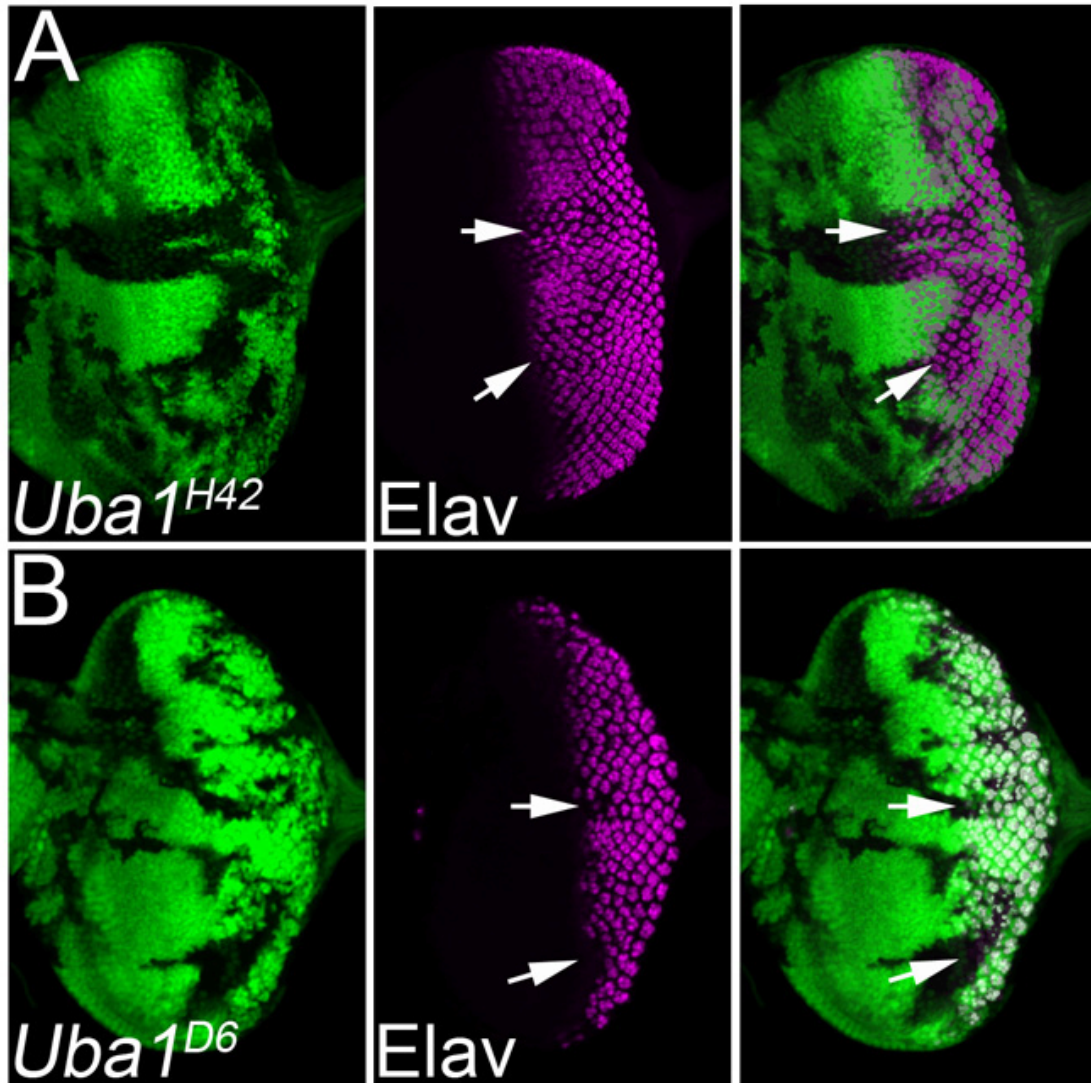

**Fig. S1. Photoreceptor differentiation in *Uba1* mutants.** Eye imaginal discs were labeled with Elav, which marks photoreceptor neurons. **(A)** The weak allele *Uba1<sup>H42</sup>* displays normal photoreceptor differentiation, although ommatidial spacing is increased. Genotype: *ey-Flp; FRT42 Uba1<sup>H42</sup>/FRT42 Pubi-GFP*. **(B)** Strong *Uba1* alleles incubated at 29°C slightly delay the onset of photoreceptor differentiation. Genotype: *ey-Flp; FRT42 Uba1<sup>D6</sup>/FRT42 Pubi-GFP*.
